# Supplementary material
Source: publisher site journal article supplement (https://www.dovepress.com/article/393917)
Supplement: Supplementary file 1 [file get_supplementary_file.php]

**Supplementary materials**

**Operation process of the patient**

**2021-09-06, Operation of pacemaker bag repair.** Free the pacemaker bag along the incision where the pacemaker is placed on the left chest wall, take out the pacemaker, and repair the pacemaker bag.

**2021-09-06, Pacemaker device removal surgery.** Select the median incision, split the sternum into the chest, cut the pericardium longitudinally, expose the ascending aorta, and thicken the aorta by about 3.5cm. Insert an artery perfusion tube at the distal end of the ascending aorta, and a drainage tube into the superior and inferior vena cava to block the ascending aorta, and then drain through the right superior pulmonary vein. Perfusion through the aortic root, cardiac arrest, blocking the superior and inferior vena cava, cutting the right atrium, probing the pacemaker lead from the right atrium through the tricuspid valve annulus, entering the right ventricle. A large number of vegetations can be seen at the perforation of the valve annulus, removing the vegetations, cutting off the pacemaker lead, repairing the perforation of the valve annulus, attaching the other lead to the connection between the right atrial appendage and the right ventricle, freeing the tissue at the connection of the lead, and cutting off the tip of the lead, Remove the two pacing leads and the pacemaker together.

**2021-09-06, Pulmonary artery thrombectomy.** The distal part of the right pulmonary artery was dissociated, the pulmonary artery was cut open, and a large amount of fragile mass tissue in the pulmonary artery was removed. The right pulmonary artery incision was continuously sutured with 6-0 prolene suture.

**2021-09-06, Temporary pacemaker placement and fascia tissue flap formation.** Open the aorta, exhaust the air at its root, the heart returns to beat, and the heart rate is 40 times/min. Suture a pacemaker lead on the right ventricular septum and the front wall, and connect the pacemaker. After the circulation is stable, gradually stop the extracorporeal circulation assistance, pull out the venous drainage tube, neutralize heparin with protamine, pull out the arterial cannula, intermittently suture the pericardium, place a left thoracic and mediastinal drainage tube, and sew the chest wall layer by layer. The left subclavian vein was punctured, the 7F vascular sheath was inserted, the Biotronik Solia 60 right ventricular pacing lead was placed at the right ventricular median interval, the right ventricular pacing lead was fixed, the Biotronik Evia pulse generator was firmly connected with the right ventricular lead, the pulse generator was fixed in the left chest, and the temporary pacing frequency was set at 80 bpm.

**2021-09-22, Temporary pacemaker removal.** After the patient's heart rate improved, the temporary pacemaker was removed. The right ventricular pacing lead was separated from the external pulse generator, and the guide wire was placed. After the right ventricular actively fixed pacing lead was spiraled back, the right ventricular pacing lead was successfully removed, and the right internal jugular vein puncture point was pressurized and bound.

**2022-09-08, Double chamber pacemaker implantation.** The patient strongly requested to place a dual chamber pacemaker. Cut the subclavian skin of the right anterior chest, separate the skin and subcutaneous tissue layer by layer, make a bag for standby, and fill it with gauze to stop bleeding. The Seldinger method was used to puncture the right axillary vein, successfully detain two guide wires, detain 7F along the guide wire to tear the sheath, and send the electrode model 4471-58cm to the lower interval through the sheath. After fixing the electrode, use the programmable controller to measure the parameters: new chamber (bipolar): threshold value 0.5V, perception 7.5mV, the impedance was 560 Ω, which was sent into the right atrial appendage through the sheath with the model 4470-52cm of the Boko atrial electrode. After the electrode was fixed, the parameters were measured with a programmable controller: new chamber (bipolar): threshold value 0.5V, perception 1.8mV, impedance 420 Ω. Connect the electrode to the Boko L211 compatible MR pacemaker, place it in the pacemaker bag for fixation, suture the subcutaneous tissue and skin layer by layer, and bind it under pressure.
